# Supplementary material for: In Vitro Activity of the Bacteriophage Endolysin HY-133 against Staphylococcus aureus Small-Colony Variants and Their Corresponding Wild Types
Source: Int J Mol Sci. 2019 Feb 7;20(3):716. doi: 10.3390/ijms20030716 (PMC6387228; doi:10.3390/ijms20030716)
Supplement: Supplementary file 1 [file ijms-20-00716-s001.pdf]

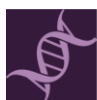

# *In vitro* Activity of the Bacteriophage Endolysin HY-133 against *Staphylococcus aureus* Small-Colony Variants and their Corresponding Wild Types

Schleimer et al.

## Supplementary Material

**Table S1.** MIC and MBC values of HY-133 and oxacillin for clinical *S. aureus* pairs OM299 and 4652 each comprising WT isolates and their clonally identical SCVs as well as of the 6850-derived triplet for the evaluation of time-kill curves.

| Antimicrobial agent | Strain pair | Strain (phenotype) | MIC and MBC <sup>1</sup> in mg/L (stationary growth <sup>2</sup> ) | MIC and MBC <sup>1</sup> in mg/L (logarithmic growth <sup>3</sup> ) |
|---------------------|-------------|--------------------|--------------------------------------------------------------------|---------------------------------------------------------------------|
| HY-133              | OM299       | OM299-1 (WT)       | 0.12                                                               | 0.5                                                                 |
|                     |             | OM299-2 (SCV)      | 0.25                                                               | 0.12                                                                |
|                     | 4652        | 4652I (WT)         | 0.12                                                               | 0.25                                                                |
|                     |             | 4652II (SCV)       | 0.25                                                               | 0.12                                                                |
|                     | 6850        | 6850 (WT)          | 0.12                                                               | 0.25                                                                |
|                     |             | JB1 (SCV)          | 0.25                                                               | 1                                                                   |
|                     |             | IIB13 (SCV)        | 0.12                                                               | 0.25                                                                |
| Oxacillin           | OM299       | OM299-1 (WT)       | 0.25                                                               | 0.25                                                                |
|                     |             | OM299-2 (SCV)      | 0.25                                                               | 0.25                                                                |
|                     | 4652        | 4652I (WT)         | 0.5                                                                | 0.5                                                                 |
|                     |             | 4652II (SCV)       | 0.25                                                               | 0.25                                                                |

<sup>1</sup> MIC and MBC values were identical for these strains.

<sup>2</sup> Determination of MIC and MBC with direct colony suspension method.

<sup>3</sup> Determination of MIC and MBC from log phase after 3 h of incubation.

MIC and MBC of each strain and growth condition were determined in triplicate and the median MIC and MBC values were calculated.
